# Supplementary material for: Systemic Coagulopathy in Hospitalized Patients With Coronavirus Disease 2019: A Systematic Review and Meta-Analysis
Source: PubMed Central journal article supplement — Clin Appl Thromb Hemost. 2021 Jan 14;27:1076029620987629. doi: 10.1177/1076029620987629 (PMC7812392; doi:10.1177/1076029620987629), 2021-01-14
Supplement: sj-pdf-1-cat-10.1177_1076029620987629.pdf [file sj-pdf-1-cat-10.1177_1076029620987629.pdf]

## Supplementary data

**Table S1** Risk of bias assessment

| <b>Risk of bias items</b>                                                                                                                                     | <b>Helms<br/>2020</b> | <b>Lodigiani<br/>2020</b> | <b>Pavoni<br/>2020</b> | <b>Tang-1<br/>2020</b> | <b>Tang-2<br/>2020</b> |
|---------------------------------------------------------------------------------------------------------------------------------------------------------------|-----------------------|---------------------------|------------------------|------------------------|------------------------|
| 1. Was the study's target population a close representation of the national population in relation to relevant variables, e.g. age, sex, occupation?          | No                    | No                        | No                     | No                     | No                     |
| 2. Was the sampling frame a true or close representation of the target population?                                                                            | Yes                   | Yes                       | Yes                    | Yes                    | Yes                    |
| 3. Was some form of random selection used to select the sample, OR, was a census undertaken?                                                                  | No                    | No                        | No                     | No                     | No                     |
| 4. Was the likelihood of non-response bias minimal?                                                                                                           | Yes                   | Yes                       | Yes                    | Yes                    | Yes                    |
| 5. Were data collected directly from the subjects (as opposed to a proxy)?                                                                                    | Yes                   | Yes                       | Yes                    | Yes                    | Yes                    |
| 6. Was an acceptable case definition used in the study?                                                                                                       | Yes                   | Yes                       | Yes                    | Yes                    | Yes                    |
| 7. Was the study instrument that measured the parameter of interest (e.g. prevalence of low back pain) shown to have reliability and validity (if necessary)? | Yes                   | Yes                       | Yes                    | Yes                    | Yes                    |
| 8. Was the same mode of data collection used for all subjects?                                                                                                | Yes                   | Yes                       | Yes                    | Yes                    | Yes                    |
| 9. Was the length of the shortest prevalence period for the parameter of interest appropriate?                                                                | Yes                   | Yes                       | Yes                    | Yes                    | Yes                    |
| 10. Were the numerator(s) and denominator(s) for the parameter of interest appropriate?                                                                       | Yes                   | Yes                       | Yes                    | Yes                    | Yes                    |
| <b>Summary item on the overall risk of study bias</b>                                                                                                         | <b>Low</b>            | <b>Low</b>                | <b>Low</b>             | <b>Low</b>             | <b>Low</b>             |
